# Supplementary material
Source: Research Square preprint supplement (doi:10.21203/rs.3.rs-9521865/v1)

501,913 UK Biobank participants

**Exclusion criteria:**

- Participants with prevalent COPD (N=17,940)
- Participants with prevalent cancer (N=241)
- Diagnosis of COPD and LC on the same day (N=4)

483,728 participants included

**Step 1** Characterize disease trajectories

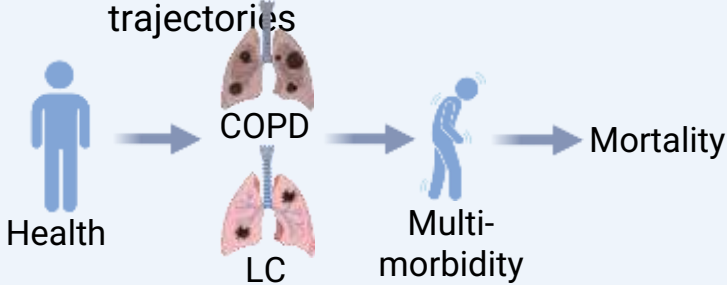

**Inclusion criterion:**

- Participants with corresponding omics data

**Step 2** Identify multiomics signatures

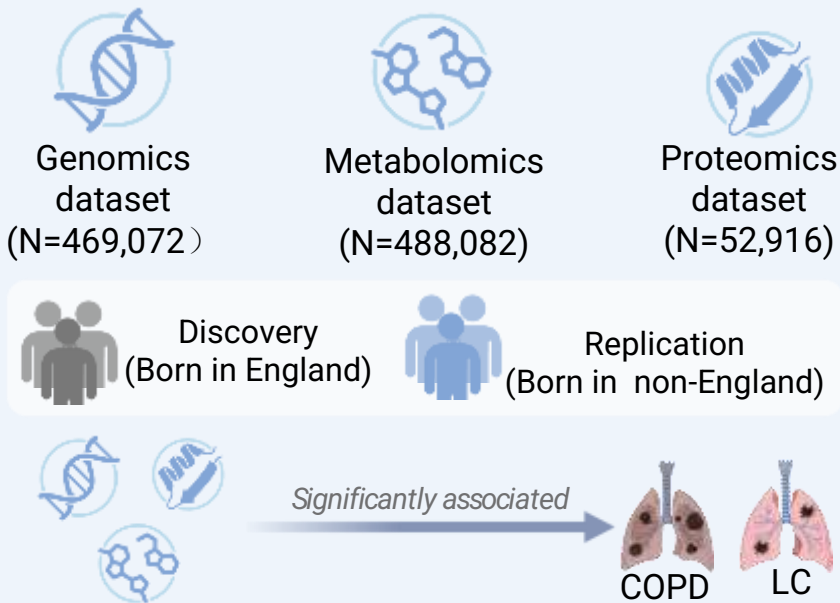

**Step 3** Construct omics-based prediction model

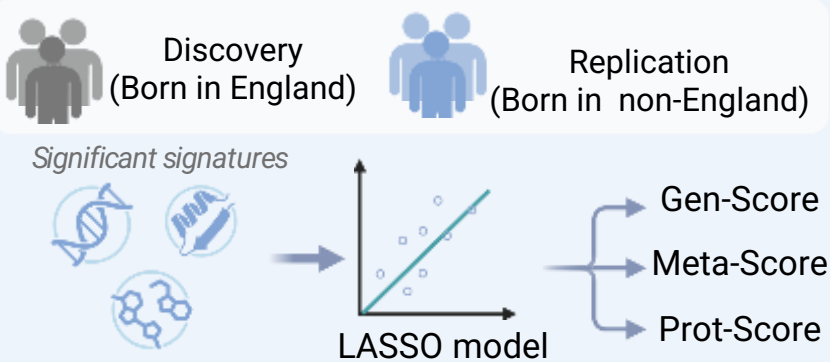

**Inclusion criterion:**

- Participants with corresponding omics data

**Step 4** Evaluate and compare model performance

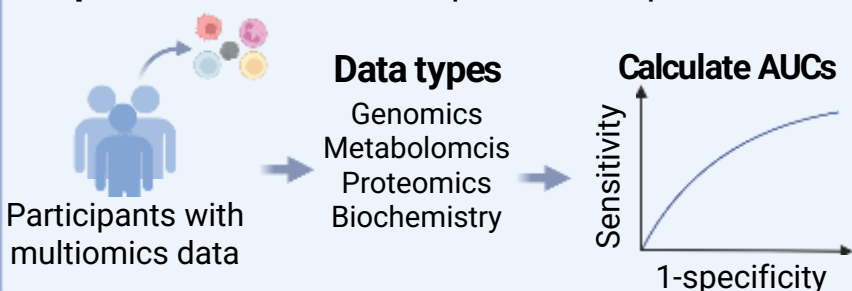

Supplement: Supplementary file 1 [file figS1_Flowchartof inclusions and exclusions..pdf › Output_Results/figS1_Flowchartof inclusions and exclusions..pdf]
