# Supplementary material
Source: Research Square preprint supplement (doi:10.21203/rs.3.rs-9521865/v1)

# Smoking Stratification Sensitivity Analysis

Hazard Ratios (95% CI) of Top Omics Markers by Smoking Status

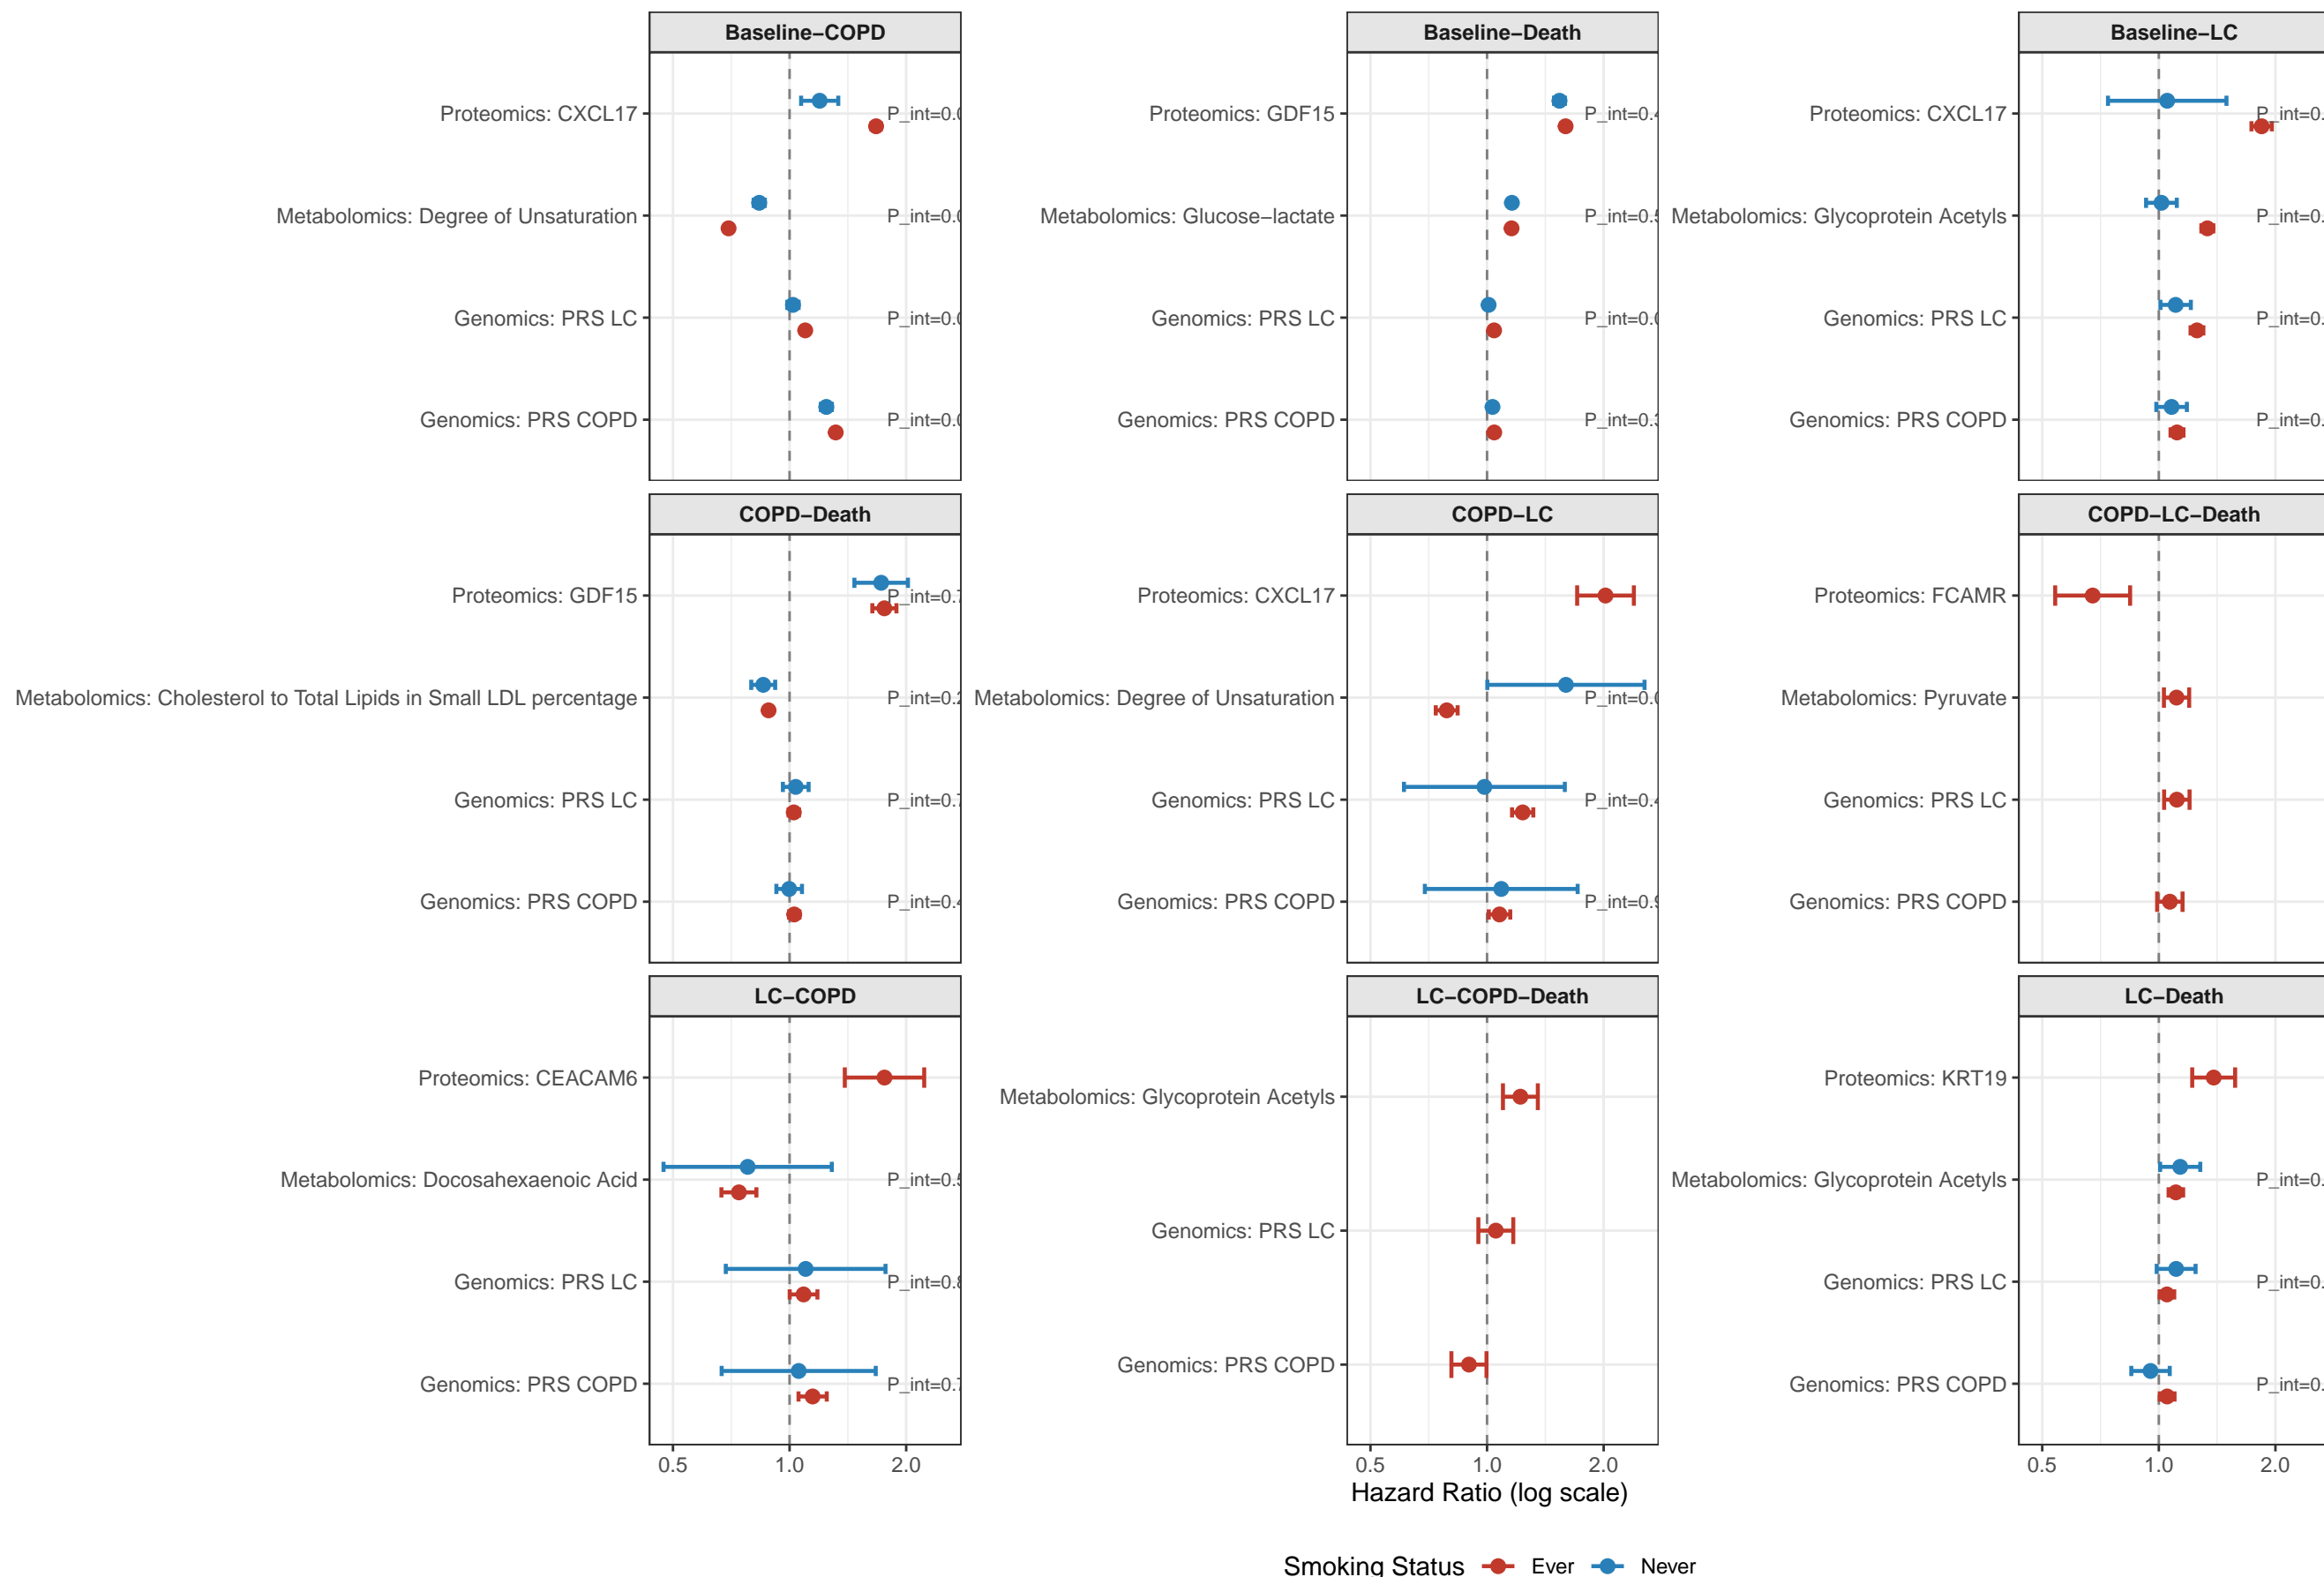

Supplement: Supplementary file 12 [file figS9_sensitivity_smoking_stratified.pdf › Output_Results/figS9_sensitivity_smoking_stratified.pdf]
