# Supplementary material
Source: Research Square preprint supplement (doi:10.21203/rs.3.rs-9521865/v1)
Supplement: Supplementary file 13 [file 75bd410eef8cb81d9c447772.docx]

## Table 1 — Baseline Characteristics Table

| **Variable** | **level** | **Overall** | **Healthy** | **COPD.Only** | **LC.Only** | **COPD.LC** | **LC.COPD** | **p** | **test** | **Missing** |
| --- | --- | --- | --- | --- | --- | --- | --- | --- | --- | --- |
| n |  | 483728 | 458078 | 20742 | 3283 | 1028 | 597 |  |  |  |
| age (median [IQR]) |  | 58.00 [50.00, 63.00] | 57.00 [50.00, 63.00] | 62.00 [57.00, 66.00] | 63.00 [58.00, 66.00] | 63.00 [59.00, 66.00] | 63.00 [58.00, 66.00] | <0.001 | nonnorm | 0.0 |
| bmi (median [IQR]) |  | 26.72 [24.13, 29.86] | 26.68 [24.11, 29.80] | 27.66 [24.63, 31.35] | 26.88 [24.29, 30.10] | 27.08 [23.89, 30.57] | 26.78 [23.78, 29.85] | <0.001 | nonnorm | 0.6 |
| income_score (median [IQR]) |  | 0.09 [0.05, 0.21] | 0.09 [0.05, 0.20] | 0.13 [0.06, 0.27] | 0.12 [0.06, 0.27] | 0.16 [0.07, 0.29] | 0.15 [0.07, 0.33] | <0.001 | nonnorm | 2.5 |
| surv_time_years (median [IQR]) |  | 13.98 [13.23, 14.70] | 14.00 [13.26, 14.72] | 13.76 [12.87, 14.57] | 10.16 [5.94, 13.41] | 11.52 [8.11, 13.48] | 11.62 [7.73, 13.84] | <0.001 | nonnorm | 0.0 |
| sex (%) | Female | 263685 (54.5) | 251500 (54.9) | 9743 (47.0) | 1693 (51.6) | 459 (44.6) | 290 (48.6) | <0.001 |  | 0.0 |
|  | Male | 220043 (45.5) | 206578 (45.1) | 10999 (53.0) | 1590 (48.4) | 569 (55.4) | 307 (51.4) |  |  |  |
| smoking (%) | Never | 195980 (40.7) | 191709 (42.1) | 3739 (18.2) | 495 (15.2) | 18 (1.8) | 19 (3.2) | <0.001 |  | 0.6 |
|  | Ever | 284984 (59.3) | 263847 (57.9) | 16814 (81.8) | 2754 (84.8) | 995 (98.2) | 574 (96.8) |  |  |  |
| alcohol (%) | Never | 21581 (4.5) | 20457 (4.5) | 952 (4.6) | 108 (3.3) | 43 (4.2) | 21 (3.6) | <0.001 |  | 0.3 |
|  | Previous | 16891 (3.5) | 15200 (3.3) | 1372 (6.6) | 207 (6.3) | 79 (7.7) | 33 (5.6) |  |  |  |
|  | Current | 443663 (92.0) | 420962 (92.2) | 18309 (88.7) | 2956 (90.4) | 900 (88.1) | 536 (90.8) |  |  |  |
| education (%) | College degree | 156628 (32.4) | 152290 (33.2) | 3487 (16.8) | 691 (21.0) | 98 (9.5) | 62 (10.4) | <0.001 |  | 0.0 |
|  | Secondary education | 53539 (11.1) | 51630 (11.3) | 1539 (7.4) | 254 (7.7) | 59 (5.7) | 57 (9.5) |  |  |  |
|  | Primary education | 132993 (27.5) | 126601 (27.6) | 5196 (25.1) | 828 (25.2) | 235 (22.9) | 133 (22.3) |  |  |  |
|  | Professional qualification | 56077 (11.6) | 52415 (11.4) | 2951 (14.2) | 470 (14.3) | 153 (14.9) | 88 (14.7) |  |  |  |
|  | Unknown | 84491 (17.5) | 75142 (16.4) | 7569 (36.5) | 1040 (31.7) | 483 (47.0) | 257 (43.0) |  |  |  |
| ethnicity (%) | White | 454579 (94.0) | 429968 (93.9) | 19868 (95.8) | 3167 (96.5) | 997 (97.0) | 579 (97.0) | <0.001 |  | 0.0 |
|  | Other | 28278 (5.8) | 27301 (6.0) | 826 (4.0) | 109 (3.3) | 27 (2.6) | 15 (2.5) |  |  |  |
|  | Unknown | 871 (0.2) | 809 (0.2) | 48 (0.2) | 7 (0.2) | 4 (0.4) | 3 (0.5) |  |  |  |
| townsend_group (%) | ≤-2.17 | 241351 (50.0) | 231734 (50.7) | 7706 (37.2) | 1410 (43.0) | 297 (28.9) | 204 (34.2) | <0.001 |  | 0.1 |
|  | >-2.17 | 241773 (50.0) | 225758 (49.3) | 13019 (62.8) | 1872 (57.0) | 731 (71.1) | 393 (65.8) |  |  |  |
| bmi_cat (%) | Normal | 157038 (32.7) | 150036 (32.9) | 5505 (26.9) | 995 (30.6) | 309 (30.3) | 193 (32.7) | <0.001 |  | 0.6 |
|  | Underweight | 2422 (0.5) | 2164 (0.5) | 215 (1.0) | 24 (0.7) | 13 (1.3) | 6 (1.0) |  |  |  |
|  | Overweight | 204820 (42.6) | 194738 (42.8) | 8027 (39.2) | 1401 (43.0) | 406 (39.8) | 248 (42.0) |  |  |  |
|  | Obese | 116495 (24.2) | 108470 (23.8) | 6755 (32.9) | 836 (25.7) | 291 (28.6) | 143 (24.2) |  |  |  |
| status (%) | 0 | 441051 (91.2) | 423973 (92.6) | 15737 (75.9) | 884 (26.9) | 258 (25.1) | 199 (33.3) | <0.001 |  | 0.0 |
|  | 1 | 42677 (8.8) | 34105 (7.4) | 5005 (24.1) | 2399 (73.1) | 770 (74.9) | 398 (66.7) |  |  |  |

### Table 2——Univariate Cox regression table

| **term** | **estimate** | **std.error** | **statistic** | **p.value** | **conf.low** | **conf.high** | **variable** |
| --- | --- | --- | --- | --- | --- | --- | --- |
| groupCOPD Only | 3.458 | 0.015 | 81.947 | 0.000 | 3.357 | 3.562 | group |
| groupLC Only | 16.890 | 0.021 | 133.421 | 0.000 | 16.203 | 17.606 | group |
| groupCOPD-LC | 15.059 | 0.036 | 74.347 | 0.000 | 14.020 | 16.175 | group |
| groupLC-COPD | 13.316 | 0.050 | 51.333 | 0.000 | 12.062 | 14.699 | group |
| age | 1.108 | 0.001 | 132.720 | 0.000 | 1.107 | 1.110 | age |
| sexMale | 1.744 | 0.010 | 56.593 | 0.000 | 1.711 | 1.778 | sex |
| bmi | 1.040 | 0.001 | 42.558 | 0.000 | 1.038 | 1.042 | bmi |
| smokingEver | 1.547 | 0.010 | 41.567 | 0.000 | 1.515 | 1.579 | smoking |
| alcoholPrevious | 1.560 | 0.029 | 15.292 | 0.000 | 1.474 | 1.652 | alcohol |
| alcoholCurrent | 0.828 | 0.022 | -8.556 | 0.000 | 0.793 | 0.865 | alcohol |
| educationSecondary education | 1.095 | 0.019 | 4.736 | 0.000 | 1.055 | 1.137 | education |
| educationPrimary education | 1.212 | 0.014 | 13.745 | 0.000 | 1.180 | 1.246 | education |
| educationProfessional qualification | 1.607 | 0.017 | 28.587 | 0.000 | 1.555 | 1.660 | education |
| educationUnknown | 2.415 | 0.013 | 66.201 | 0.000 | 2.352 | 2.478 | education |
| ethnicityOther | 0.729 | 0.024 | -13.082 | 0.000 | 0.695 | 0.764 | ethnicity |
| ethnicityUnknown | 1.161 | 0.108 | 1.387 | 0.166 | 0.940 | 1.435 | ethnicity |
| townsend_group>-2.17 | 1.243 | 0.010 | 22.331 | 0.000 | 1.219 | 1.267 | townsend_group |
| income_score | 1.011 | 0.001 | 17.516 | 0.000 | 1.010 | 1.012 | income_score |

**Table 3——Multivariate Cox regression table**

| **term** | **estimate** | **std.error** | **statistic** | **p.value** | **conf.low** | **conf.high** |
| --- | --- | --- | --- | --- | --- | --- |
| groupCOPD Only | 2.148 | 0.016 | 47.640 | 0.000 | 2.082 | 2.217 |
| groupLC Only | 10.964 | 0.022 | 109.049 | 0.000 | 10.502 | 11.446 |
| groupCOPD-LC | 8.209 | 0.038 | 55.514 | 0.000 | 7.621 | 8.843 |
| groupLC-COPD | 8.290 | 0.052 | 40.769 | 0.000 | 7.488 | 9.177 |
| age | 1.097 | 0.001 | 111.815 | 0.000 | 1.095 | 1.098 |
| sexMale | 1.641 | 0.010 | 48.264 | 0.000 | 1.608 | 1.674 |
| bmi | 1.029 | 0.001 | 27.575 | 0.000 | 1.027 | 1.031 |
| smokingEver | 1.182 | 0.011 | 14.946 | 0.000 | 1.157 | 1.208 |
| alcoholPrevious | 1.220 | 0.031 | 6.485 | 0.000 | 1.149 | 1.296 |
| alcoholCurrent | 0.788 | 0.024 | -10.073 | 0.000 | 0.752 | 0.825 |
| educationSecondary education | 1.087 | 0.020 | 4.263 | 0.000 | 1.046 | 1.130 |
| educationPrimary education | 1.123 | 0.014 | 8.048 | 0.000 | 1.092 | 1.156 |
| educationProfessional qualification | 1.092 | 0.017 | 5.152 | 0.000 | 1.056 | 1.130 |
| educationUnknown | 1.260 | 0.014 | 16.108 | 0.000 | 1.225 | 1.296 |
| ethnicityOther | 0.963 | 0.026 | -1.444 | 0.149 | 0.914 | 1.014 |
| ethnicityUnknown |  | 0.000 |  |  |  |  |
| townsend_group>-2.17 | 1.194 | 0.010 | 17.151 | 0.000 | 1.170 | 1.219 |
| income_score | 1.008 | 0.001 | 11.501 | 0.000 | 1.006 | 1.009 |

### Table 4——Detailed Results Table of Smoking Stratification

| **smoking** | **transition** | **omics_type** | **marker** | **hr** | **ci_low** | **ci_high** | **pvalue** | **sig** | **interaction_p** |
| --- | --- | --- | --- | --- | --- | --- | --- | --- | --- |
| Never | Baseline-COPD | Genomics: PRS COPD | copd_prs | 1.244 | 1.204 | 1.286 | 0.000 | * | 0.000 |
| Never | Baseline-COPD | Genomics: PRS LC | lc_prs | 1.020 | 0.987 | 1.055 | 0.238 |  | 0.000 |
| Never | Baseline-COPD | Proteomics: CXCL17 | CXCL17 | 1.196 | 1.071 | 1.336 | 0.001 | * | 0.005 |
| Never | Baseline-COPD | Metabolomics: Degree of Unsaturation | Degree of Unsaturation | 0.835 | 0.808 | 0.863 | 0.000 | * | 0.000 |
| Never | Baseline-LC | Genomics: PRS COPD | copd_prs | 1.079 | 0.985 | 1.181 | 0.102 |  | 0.486 |
| Never | Baseline-LC | Genomics: PRS LC | lc_prs | 1.105 | 1.010 | 1.210 | 0.030 | * | 0.008 |
| Never | Baseline-LC | Proteomics: CXCL17 | CXCL17 | 1.051 | 0.739 | 1.495 | 0.781 |  | 0.058 |
| Never | Baseline-LC | Metabolomics: Glycoprotein Acetyls | Glycoprotein Acetyls | 1.016 | 0.927 | 1.113 | 0.739 |  | 0.000 |
| Never | Baseline-Death | Genomics: PRS COPD | copd_prs | 1.033 | 1.014 | 1.052 | 0.001 | * | 0.313 |
| Never | Baseline-Death | Genomics: PRS LC | lc_prs | 1.009 | 0.991 | 1.028 | 0.335 |  | 0.004 |
| Never | Baseline-Death | Proteomics: GDF15 | GDF15 | 1.538 | 1.489 | 1.589 | 0.000 | * | 0.455 |
| Never | Baseline-Death | Metabolomics: Glucose-lactate | Glucose-lactate | 1.159 | 1.146 | 1.172 | 0.000 | * | 0.502 |
| Never | COPD-LC | Genomics: PRS COPD | copd_prs | 1.088 | 0.691 | 1.713 | 0.716 |  | 0.989 |
| Never | COPD-LC | Genomics: PRS LC | lc_prs | 0.984 | 0.610 | 1.588 | 0.948 |  | 0.402 |
| Never | COPD-LC | Metabolomics: Degree of Unsaturation | Degree of Unsaturation | 1.598 | 1.002 | 2.550 | 0.049 | * | 0.003 |
| Never | COPD-Death | Genomics: PRS COPD | copd_prs | 0.998 | 0.925 | 1.076 | 0.951 |  | 0.463 |
| Never | COPD-Death | Genomics: PRS LC | lc_prs | 1.037 | 0.961 | 1.120 | 0.346 |  | 0.767 |
| Never | COPD-Death | Proteomics: GDF15 | GDF15 | 1.724 | 1.470 | 2.021 | 0.000 | * | 0.787 |
| Never | COPD-Death | Metabolomics: Cholesterol to Total Lipids in Small LDL percentage | Cholesterol to Total Lipids in Small LDL percentage | 0.855 | 0.796 | 0.918 | 0.000 | * | 0.234 |
| Never | LC-COPD | Genomics: PRS COPD | copd_prs | 1.056 | 0.668 | 1.669 | 0.816 |  | 0.795 |
| Never | LC-COPD | Genomics: PRS LC | lc_prs | 1.100 | 0.684 | 1.769 | 0.693 |  | 0.885 |
| Never | LC-COPD | Metabolomics: Docosahexaenoic Acid | Docosahexaenoic Acid | 0.779 | 0.473 | 1.285 | 0.329 |  | 0.577 |
| Never | LC-Death | Genomics: PRS COPD | copd_prs | 0.952 | 0.849 | 1.067 | 0.397 |  | 0.094 |
| Never | LC-Death | Genomics: PRS LC | lc_prs | 1.108 | 0.987 | 1.244 | 0.081 |  | 0.436 |
| Never | LC-Death | Metabolomics: Glycoprotein Acetyls | Glycoprotein Acetyls | 1.135 | 1.008 | 1.279 | 0.037 | * | 0.630 |
| Ever | Baseline-COPD | Genomics: PRS COPD | copd_prs | 1.316 | 1.295 | 1.336 | 0.000 | * | 0.000 |
| Ever | Baseline-COPD | Genomics: PRS LC | lc_prs | 1.097 | 1.081 | 1.115 | 0.000 | * | 0.000 |
| Ever | Baseline-COPD | Proteomics: CXCL17 | CXCL17 | 1.673 | 1.628 | 1.719 | 0.000 | * | 0.005 |
| Ever | Baseline-COPD | Metabolomics: Degree of Unsaturation | Degree of Unsaturation | 0.696 | 0.685 | 0.707 | 0.000 | * | 0.000 |
| Ever | Baseline-LC | Genomics: PRS COPD | copd_prs | 1.114 | 1.072 | 1.158 | 0.000 | * | 0.486 |
| Ever | Baseline-LC | Genomics: PRS LC | lc_prs | 1.254 | 1.208 | 1.303 | 0.000 | * | 0.008 |
| Ever | Baseline-LC | Proteomics: CXCL17 | CXCL17 | 1.842 | 1.734 | 1.957 | 0.000 | * | 0.058 |
| Ever | Baseline-LC | Metabolomics: Glycoprotein Acetyls | Glycoprotein Acetyls | 1.334 | 1.288 | 1.383 | 0.000 | * | 0.000 |
| Ever | Baseline-Death | Genomics: PRS COPD | copd_prs | 1.044 | 1.029 | 1.058 | 0.000 | * | 0.313 |
| Ever | Baseline-Death | Genomics: PRS LC | lc_prs | 1.043 | 1.028 | 1.057 | 0.000 | * | 0.004 |
| Ever | Baseline-Death | Proteomics: GDF15 | GDF15 | 1.595 | 1.555 | 1.636 | 0.000 | * | 0.455 |
| Ever | Baseline-Death | Metabolomics: Glucose-lactate | Glucose-lactate | 1.157 | 1.147 | 1.166 | 0.000 | * | 0.502 |
| Ever | COPD-LC | Genomics: PRS COPD | copd_prs | 1.077 | 1.010 | 1.148 | 0.023 | * | 0.989 |
| Ever | COPD-LC | Genomics: PRS LC | lc_prs | 1.236 | 1.160 | 1.316 | 0.000 | * | 0.402 |
| Ever | COPD-LC | Proteomics: CXCL17 | CXCL17 | 2.022 | 1.709 | 2.393 | 0.000 | * | 0.615 |
| Ever | COPD-LC | Metabolomics: Degree of Unsaturation | Degree of Unsaturation | 0.787 | 0.737 | 0.840 | 0.000 | * | 0.003 |
| Ever | COPD-Death | Genomics: PRS COPD | copd_prs | 1.028 | 0.997 | 1.060 | 0.078 |  | 0.463 |
| Ever | COPD-Death | Genomics: PRS LC | lc_prs | 1.025 | 0.994 | 1.057 | 0.109 |  | 0.767 |
| Ever | COPD-Death | Proteomics: GDF15 | GDF15 | 1.757 | 1.635 | 1.887 | 0.000 | * | 0.787 |
| Ever | COPD-Death | Metabolomics: Cholesterol to Total Lipids in Small LDL percentage | Cholesterol to Total Lipids in Small LDL percentage | 0.883 | 0.869 | 0.896 | 0.000 | * | 0.234 |
| Ever | LC-COPD | Genomics: PRS COPD | copd_prs | 1.147 | 1.055 | 1.247 | 0.001 | * | 0.795 |
| Ever | LC-COPD | Genomics: PRS LC | lc_prs | 1.087 | 1.001 | 1.180 | 0.048 | * | 0.885 |
| Ever | LC-COPD | Proteomics: CEACAM6 | CEACAM6 | 1.758 | 1.389 | 2.226 | 0.000 | * | 0.712 |
| Ever | LC-COPD | Metabolomics: Docosahexaenoic Acid | Docosahexaenoic Acid | 0.740 | 0.667 | 0.821 | 0.000 | * | 0.577 |
| Ever | LC-Death | Genomics: PRS COPD | copd_prs | 1.051 | 1.006 | 1.098 | 0.027 | * | 0.094 |
| Ever | LC-Death | Genomics: PRS LC | lc_prs | 1.049 | 1.005 | 1.096 | 0.030 | * | 0.436 |
| Ever | LC-Death | Proteomics: KRT19 | KRT19 | 1.386 | 1.220 | 1.574 | 0.000 | * | 0.906 |
| Ever | LC-Death | Metabolomics: Glycoprotein Acetyls | Glycoprotein Acetyls | 1.107 | 1.060 | 1.155 | 0.000 | * | 0.630 |
| Ever | COPD-LC-Death | Genomics: PRS COPD | copd_prs | 1.068 | 0.990 | 1.151 | 0.090 |  | 0.823 |
| Ever | COPD-LC-Death | Genomics: PRS LC | lc_prs | 1.113 | 1.032 | 1.200 | 0.006 | * | 0.239 |
| Ever | COPD-LC-Death | Proteomics: FCAMR | FCAMR | 0.675 | 0.540 | 0.843 | 0.001 | * |  |
| Ever | COPD-LC-Death | Metabolomics: Pyruvate | Pyruvate | 1.111 | 1.031 | 1.198 | 0.006 | * | 0.766 |
| Ever | LC-COPD-Death | Genomics: PRS COPD | copd_prs | 0.898 | 0.809 | 0.997 | 0.043 | * | 0.742 |
| Ever | LC-COPD-Death | Genomics: PRS LC | lc_prs | 1.053 | 0.950 | 1.169 | 0.325 |  | 0.247 |
| Ever | LC-COPD-Death | Metabolomics: Glycoprotein Acetyls | Glycoprotein Acetyls | 1.219 | 1.099 | 1.352 | 0.000 | * | 0.404 |

### Table 5——Interaction test result table (Smoking × Marker)

| **transition** | **marker** | **interaction_hr** | **interaction_p** |
| --- | --- | --- | --- |
| Baseline-COPD | copd_prs | 1.069 | 0.000 |
| Baseline-COPD | lc_prs | 1.079 | 0.000 |
| Baseline-COPD | CXCL17 | 1.189 | 0.005 |
| Baseline-COPD | Degree of Unsaturation | 0.830 | 0.000 |
| Baseline-LC | copd_prs | 1.035 | 0.486 |
| Baseline-LC | lc_prs | 1.139 | 0.008 |
| Baseline-LC | CXCL17 | 1.434 | 0.058 |
| Baseline-LC | Glycoprotein Acetyls | 1.291 | 0.000 |
| Baseline-Death | copd_prs | 1.012 | 0.313 |
| Baseline-Death | lc_prs | 1.034 | 0.004 |
| Baseline-Death | GDF15 | 1.016 | 0.455 |
| Baseline-Death | Glucose-lactate | 0.995 | 0.502 |
| COPD-LC | copd_prs | 1.003 | 0.989 |
| COPD-LC | lc_prs | 1.222 | 0.402 |
| COPD-LC | Degree of Unsaturation | 0.503 | 0.003 |
| COPD-LC | CXCL17 | 1.482 | 0.615 |
| COPD-Death | copd_prs | 1.031 | 0.463 |
| COPD-Death | lc_prs | 0.988 | 0.767 |
| COPD-Death | GDF15 | 1.024 | 0.787 |
| COPD-Death | Cholesterol to Total Lipids in Small LDL percentage | 1.049 | 0.234 |
| LC-COPD | copd_prs | 1.060 | 0.795 |
| LC-COPD | lc_prs | 0.967 | 0.885 |
| LC-COPD | Docosahexaenoic Acid | 0.873 | 0.577 |
| LC-COPD | CEACAM6 | 1.385 | 0.712 |
| LC-Death | copd_prs | 1.104 | 0.094 |
| LC-Death | lc_prs | 0.955 | 0.436 |
| LC-Death | Glycoprotein Acetyls | 0.966 | 0.630 |
| LC-Death | KRT19 | 1.029 | 0.906 |
| COPD-LC-Death | copd_prs | 1.052 | 0.823 |
| COPD-LC-Death | lc_prs | 1.663 | 0.239 |
| COPD-LC-Death | Pyruvate | 0.836 | 0.766 |
| LC-COPD-Death | copd_prs | 0.877 | 0.742 |
| LC-COPD-Death | lc_prs | 1.944 | 0.247 |
| LC-COPD-Death | Glycoprotein Acetyls | 0.694 | 0.404 |
