# Supplementary material
Source: Research Square preprint supplement (doi:10.21203/rs.3.rs-9521865/v1)
Supplement: Supplementary file 14 [file aeb220d31ee56c227e6d0632.docx]

**Supplementary Information**

**Abbreviations**

List of abbreviations used in the manuscript "Multi-omics Insights into the Disease Trajectory from Chronic Obstructive Pulmonary Disease to Lung Cancer".

| **Abbreviation** | **Full term** |
| --- | --- |
| COPD | Chronic obstructive pulmonary disease |
| LC | Lung cancer |
| UKB | UK Biobank |
| BMI | Body mass index |
| TDI | Townsend deprivation index |
| ICD | International Classification of Diseases |
| EHR | Electronic health record |
| LDCT | Low-dose computed tomography |
| NLST | National Lung Screening Trial |
| NELSON | Dutch-Belgian Randomised Lung Cancer Screening Trial |
| HR | Hazard ratio |
| CI | Confidence interval |
| SD | Standard deviation |
| AUC | Area under the receiver-operating characteristic curve |
| ROC | Receiver-operating characteristic |
| PCA | Principal component analysis |
| LASSO | Least absolute shrinkage and selection operator |
| FDR | False discovery rate |
| RMST | Restricted mean survival time |
| PRS | Polygenic risk score |
| TRIPOD | Transparent Reporting of a multivariable prediction model for Individual Prognosis Or Diagnosis |
| NMR | Nuclear magnetic resonance |
| GWAS | Genome-wide association study |
| KEGG | Kyoto Encyclopedia of Genes and Genomes |
| GO | Gene Ontology |
| PI3K-Akt | Phosphoinositide 3-kinase / protein kinase B signalling pathway |
| NF-κB | Nuclear factor kappa-light-chain-enhancer of activated B cells |
| MAPK | Mitogen-activated protein kinase |
| VLDL | Very-low-density lipoprotein |
| LDL | Low-density lipoprotein |
| HDL | High-density lipoprotein |
| IDL | Intermediate-density lipoprotein |
| GlycA | Glycoprotein acetyls |
| DHA | Docosahexaenoic acid |
| GDF15 | Growth/differentiation factor 15 |
| GFRAL | GDNF family receptor alpha-like |
| CXCL17 | C-X-C motif chemokine ligand 17 |
| WFDC2 | WAP four-disulfide core domain protein 2 |
| HE4 | Human epididymis protein 4 (alias for WFDC2) |
| ALPP | Alkaline phosphatase, placental type |
| PLAUR | Plasminogen activator, urokinase receptor |
| CEACAM6 | Carcinoembryonic antigen-related cell adhesion molecule 6 |
| SCGB1A1 | Secretoglobin family 1A member 1 (club cell 16-kDa protein) |
| EGFR | Epidermal growth factor receptor |
| ITGA11 | Integrin alpha-11 |
| ITGAV | Integrin alpha-V |
| MXRA8 | Matrix remodelling-associated protein 8 |
| IL-6 | Interleukin-6 |
| IL-7R | Interleukin-7 receptor |
| TNR | Tenascin-R |
| BCAN | Brevican |
| HGF | Hepatocyte growth factor |
| CCL2 | C-C motif chemokine ligand 2 |
| TNFSF13B | Tumour necrosis factor superfamily member 13B |
| OSMR | Oncostatin M receptor |
| CD38 | CD38 molecule (cyclic ADP-ribose hydrolase) |
| CD74 | CD74 molecule (HLA class II histocompatibility antigen gamma chain) |
| KRT19 | Keratin 19 |
| MSLN | Mesothelin |
| NPC2 | NPC intracellular cholesterol transporter 2 |
| TNFRSF10B | Tumour necrosis factor receptor superfamily member 10B |
| AREG | Amphiregulin |
