# Supplementary material
Source: Research Square preprint supplement (doi:10.21203/rs.3.rs-9521865/v1)

Subgroup Analysis: COPD Only vs Healthy (Reference)

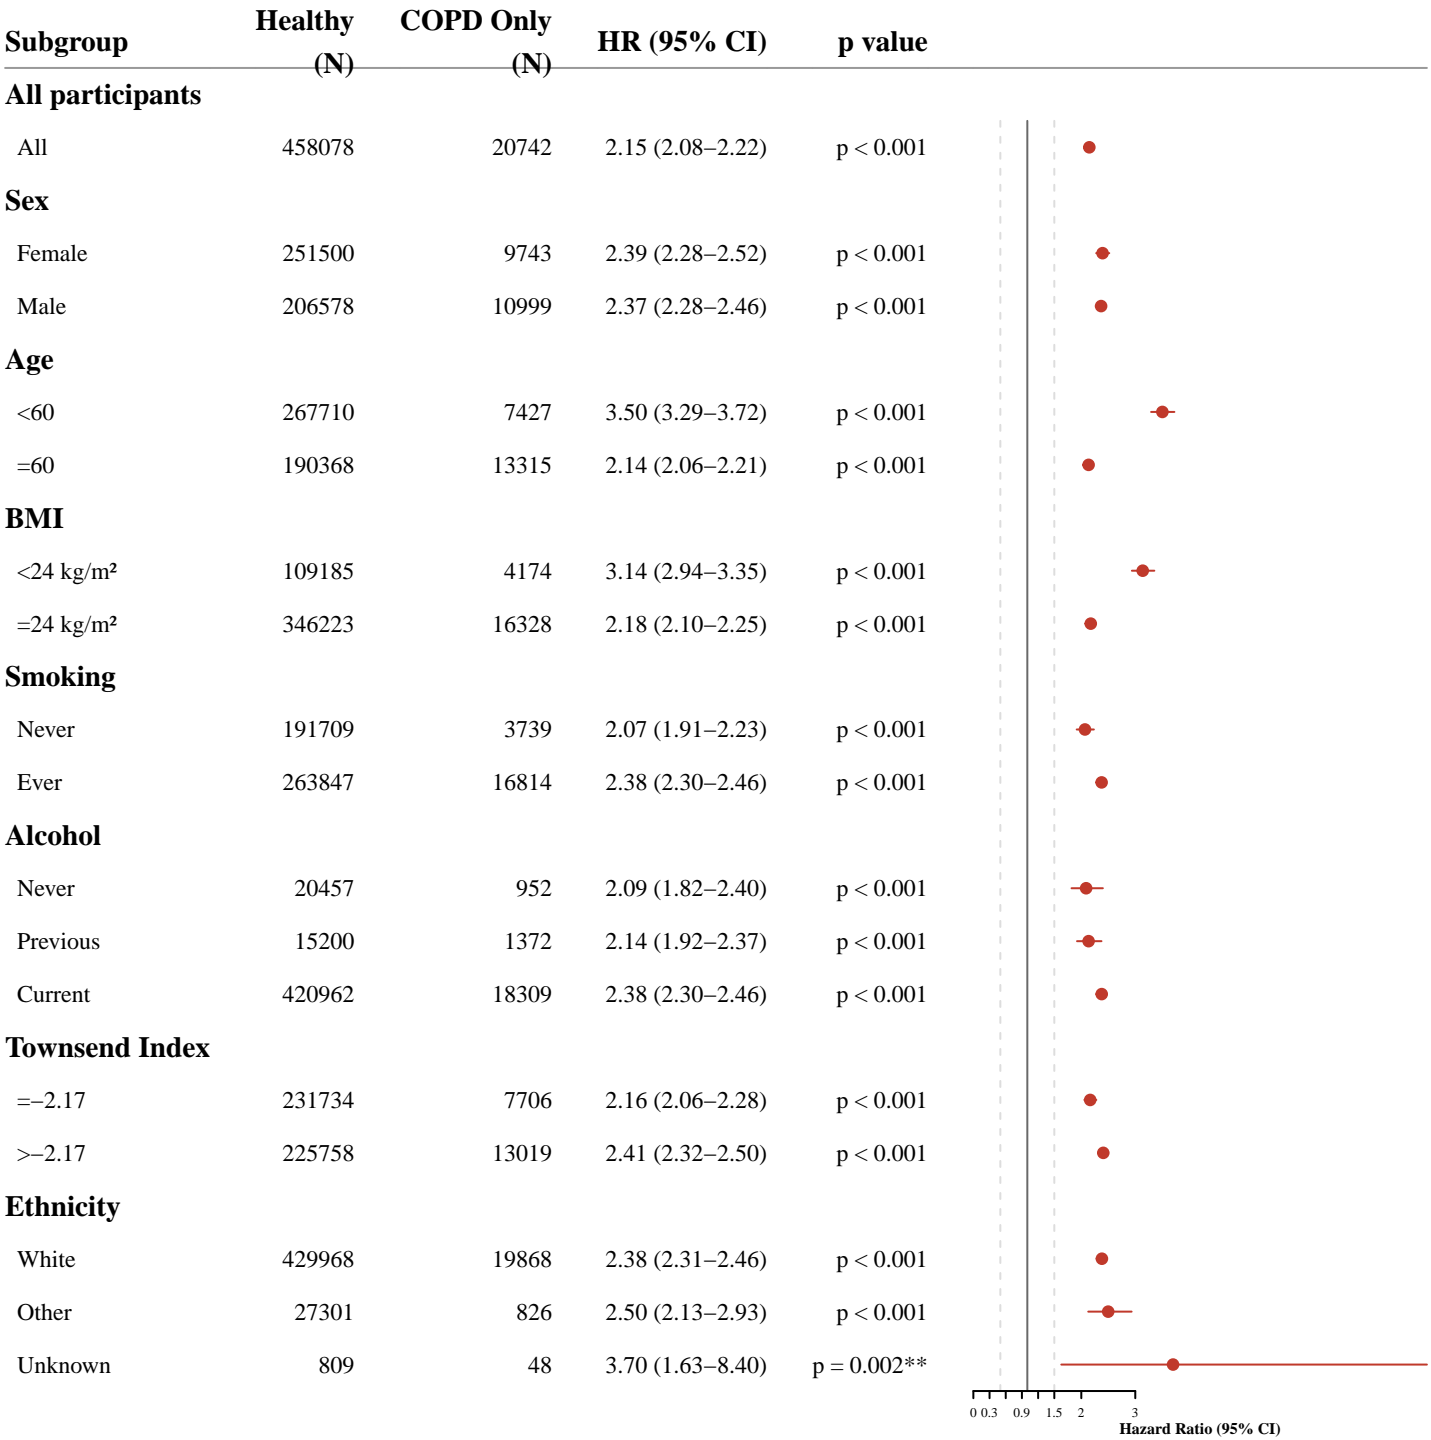

Supplement: Supplementary file 2 [file figS2_COPD_Only_forest.pdf › Output_Results/figS2_COPD_Only_forest.pdf]

Subgroup Analysis: LC Only vs Healthy (Reference)

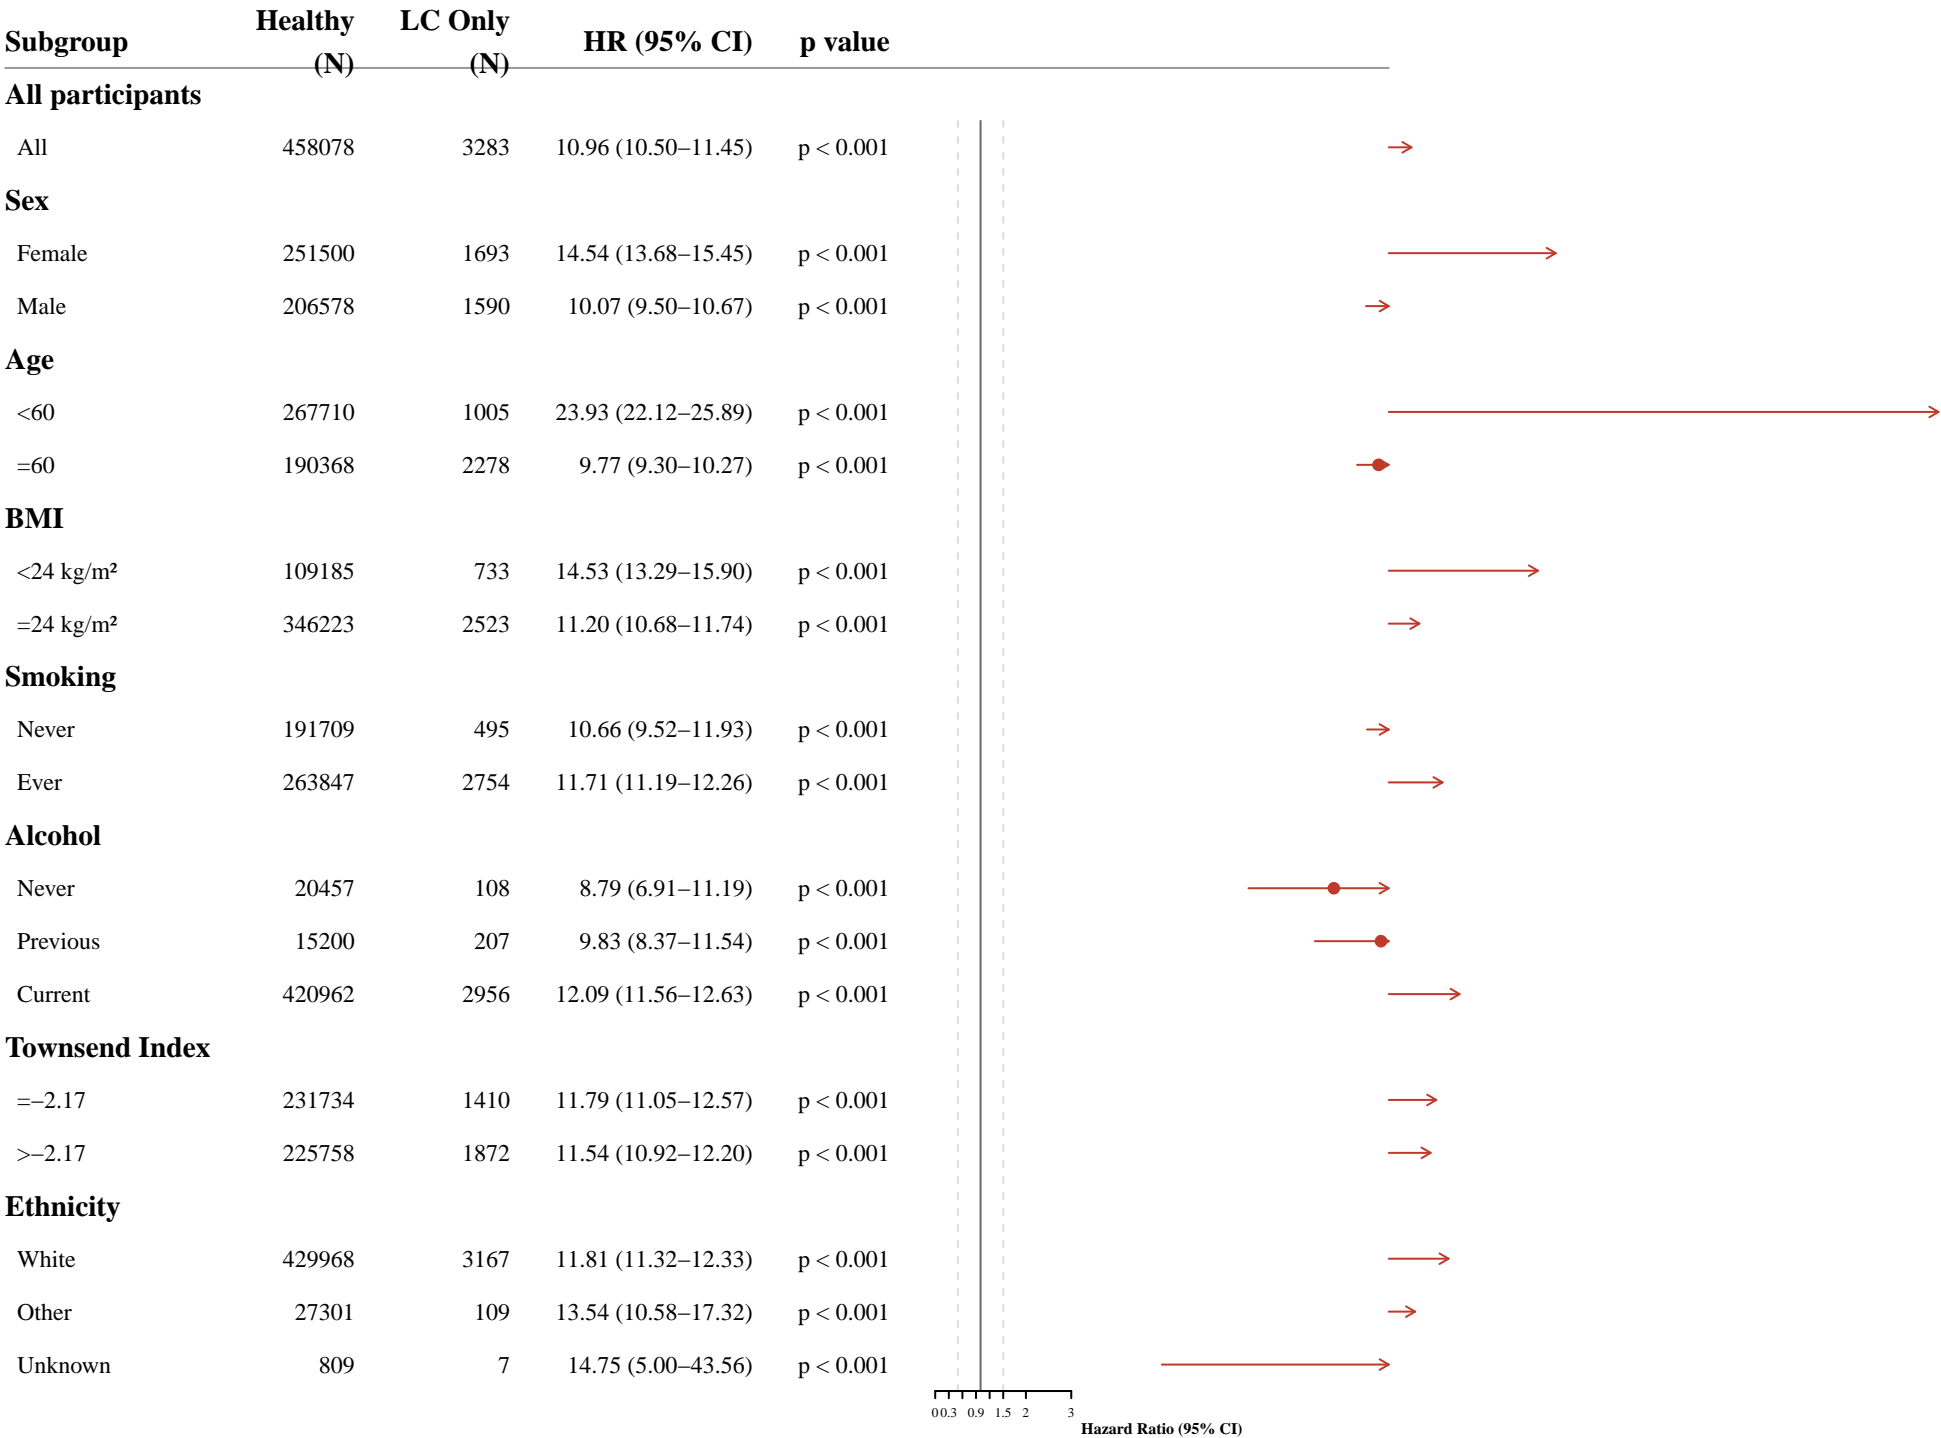

Supplement: Supplementary file 3 [file figS3_LC_Only_forest.pdf › Output_Results/figS3_LC_Only_forest.pdf]

Subgroup Analysis: COPD–LC vs Healthy (Reference)

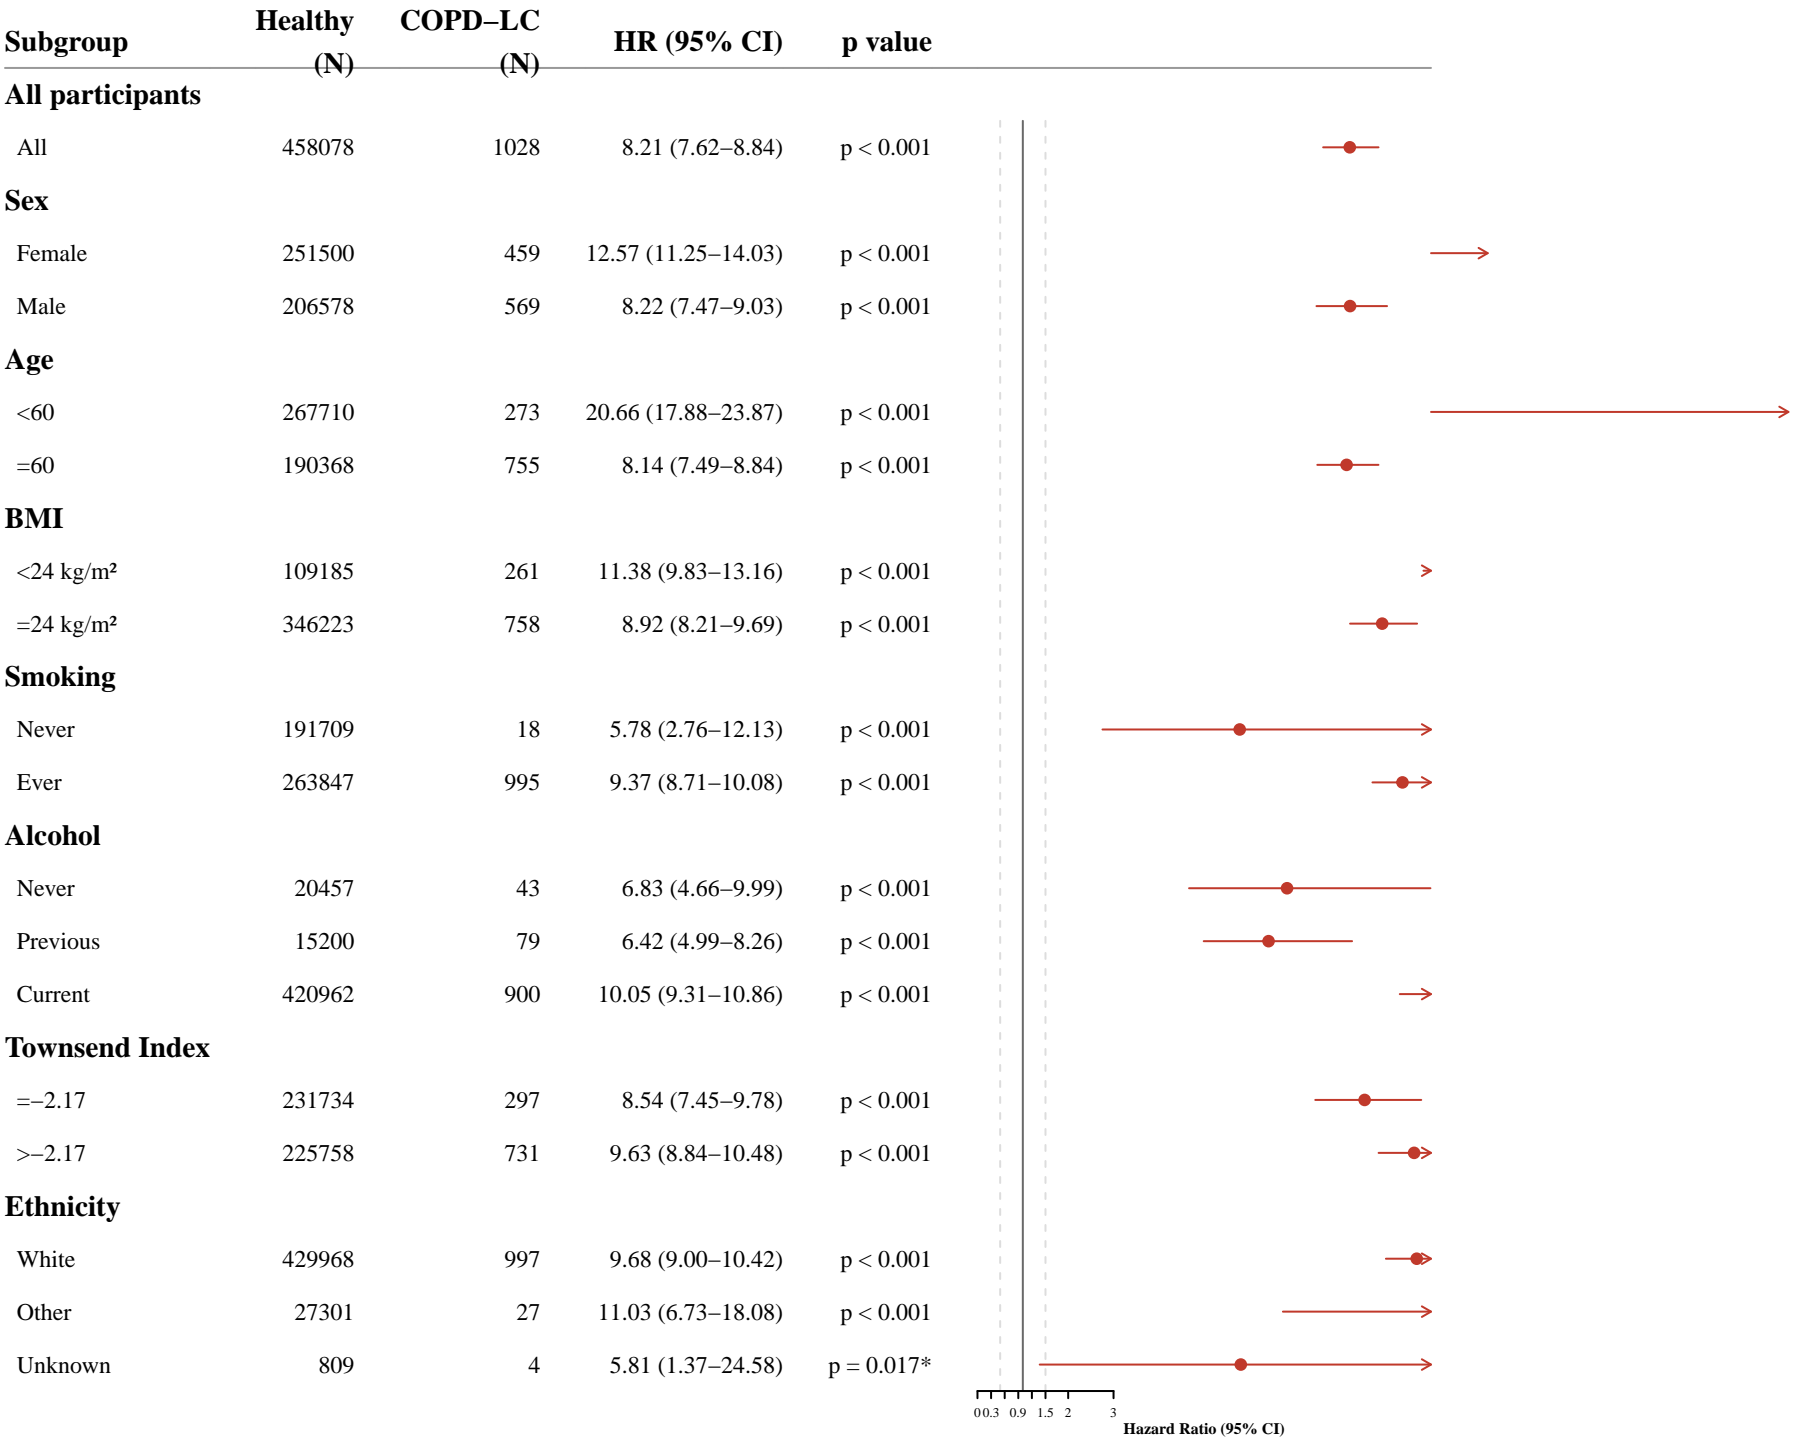

Supplement: Supplementary file 4 [file figS4_COPD-LC_forest.pdf › Output_Results/figS4_COPD-LC_forest.pdf]

Subgroup Analysis: LC–COPD vs Healthy (Reference)

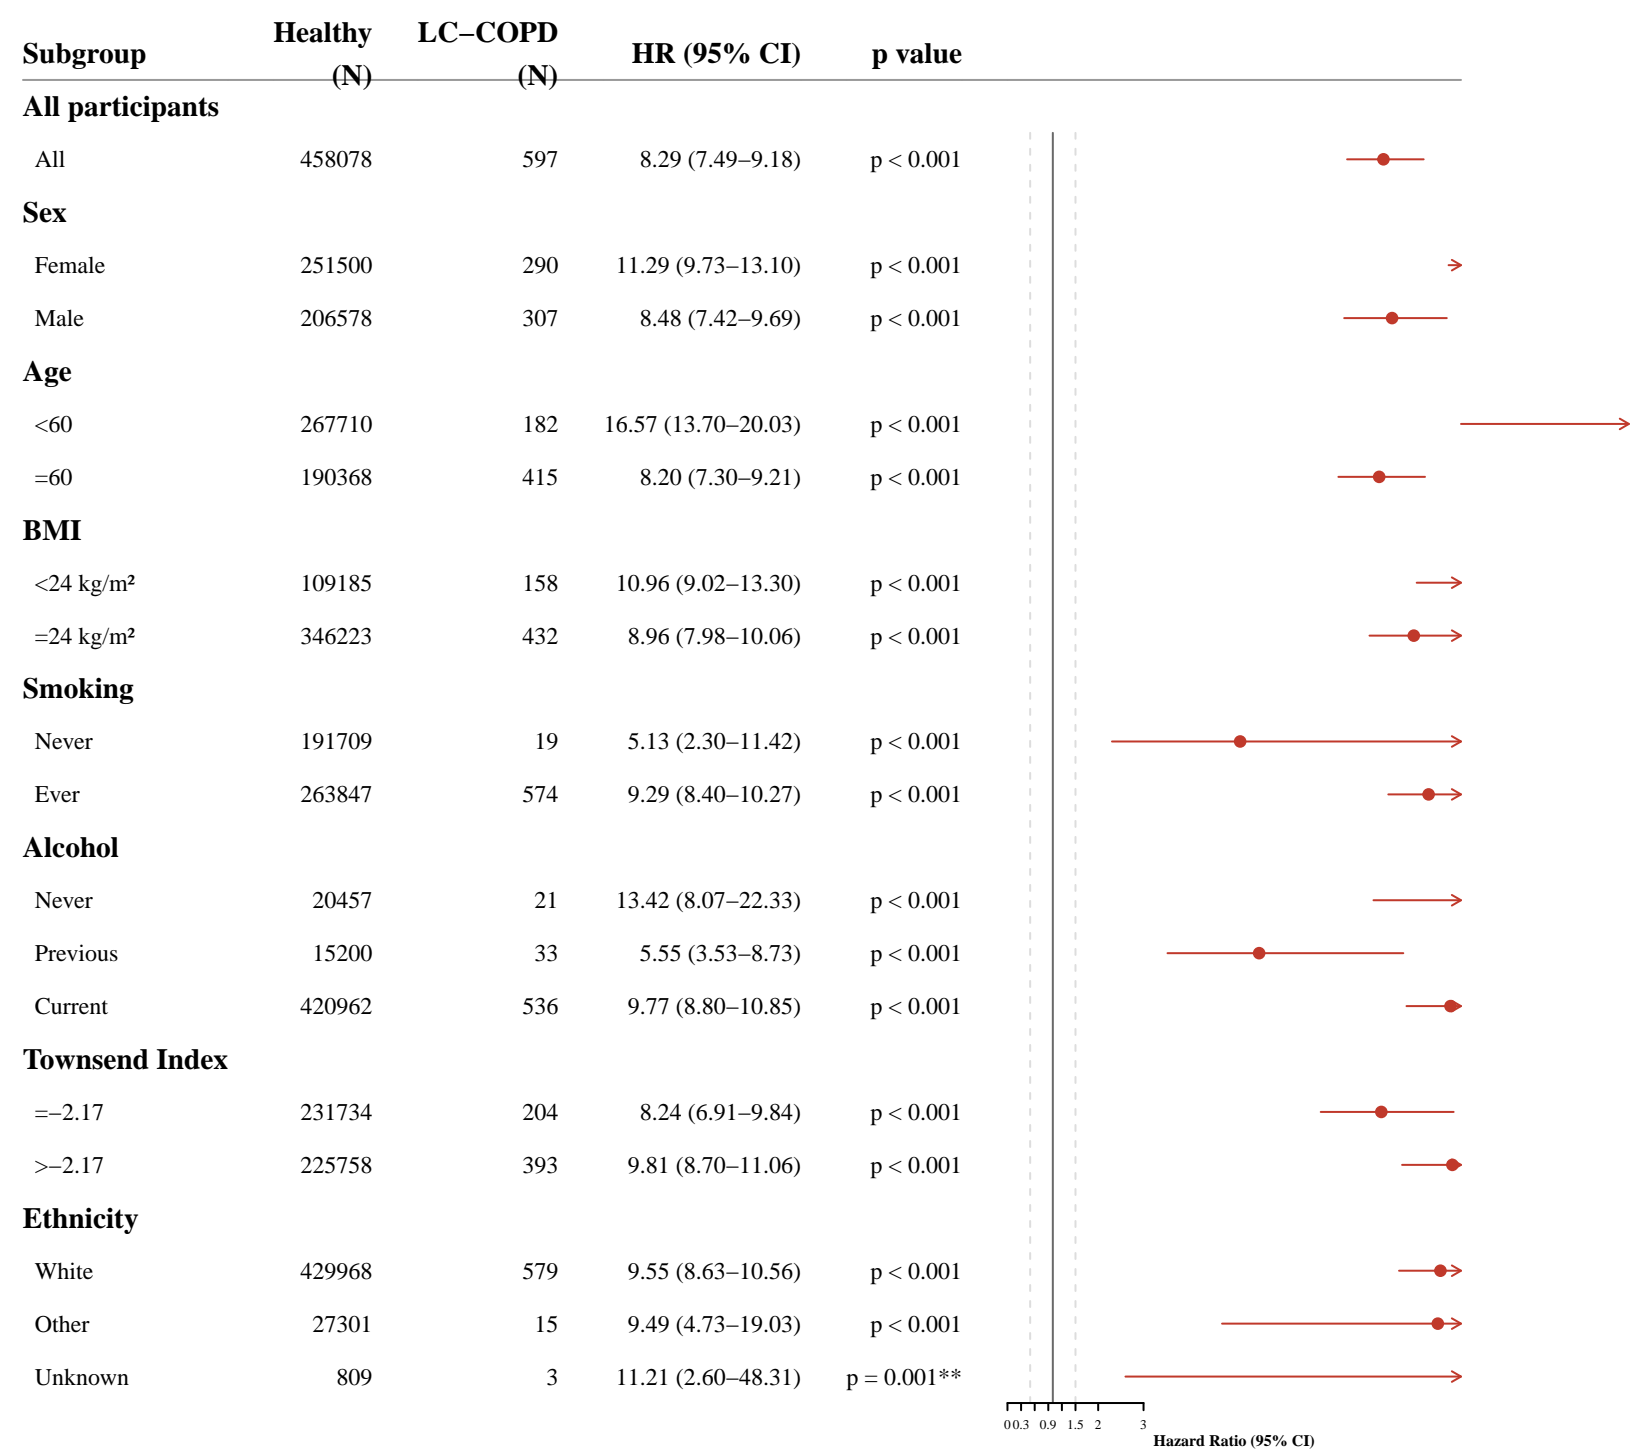

Supplement: Supplementary file 5 [file figS5_LC-COPD_forest.pdf › Output_Results/figS5_LC-COPD_forest.pdf]

Cox Regression: Disease Groups vs Healthy (Reference)  
Univariate and Multivariate Results

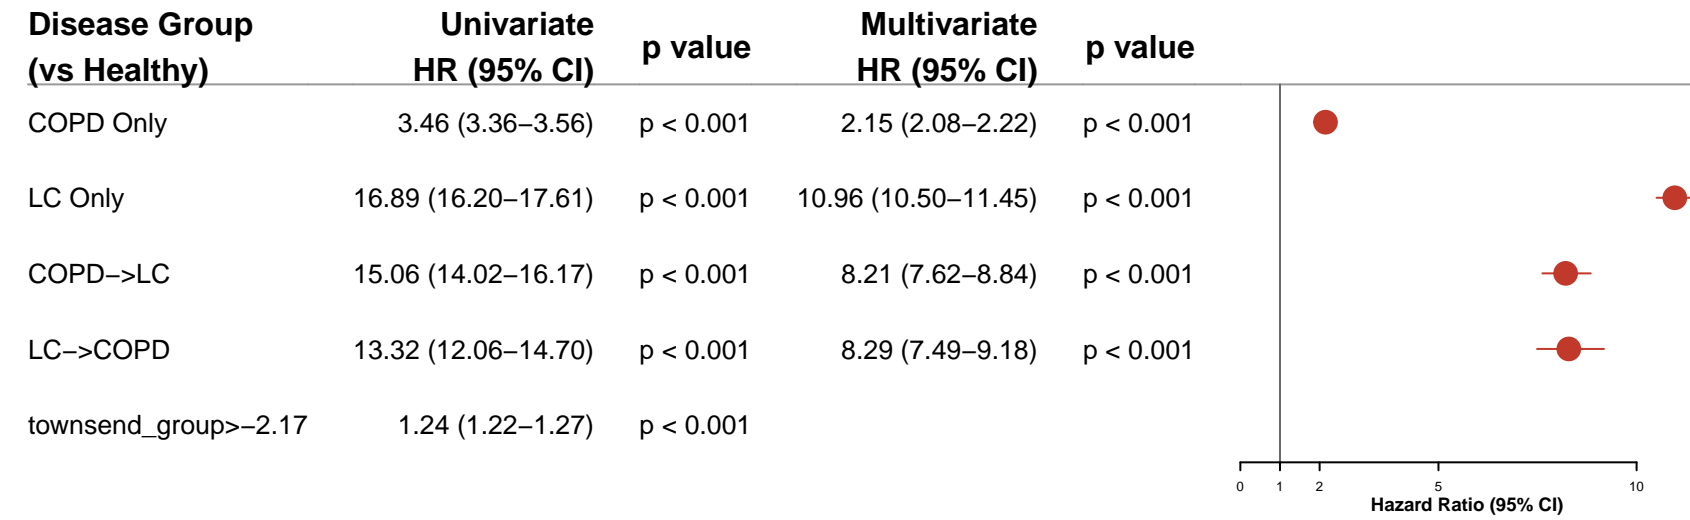

Supplement: Supplementary file 6 [file figS6_forest_plot_combined_uni_multi.pdf › Output_Results/figS6_forest_plot_combined_uni_multi.pdf]

# Metabolomics: Pathway Enrichment

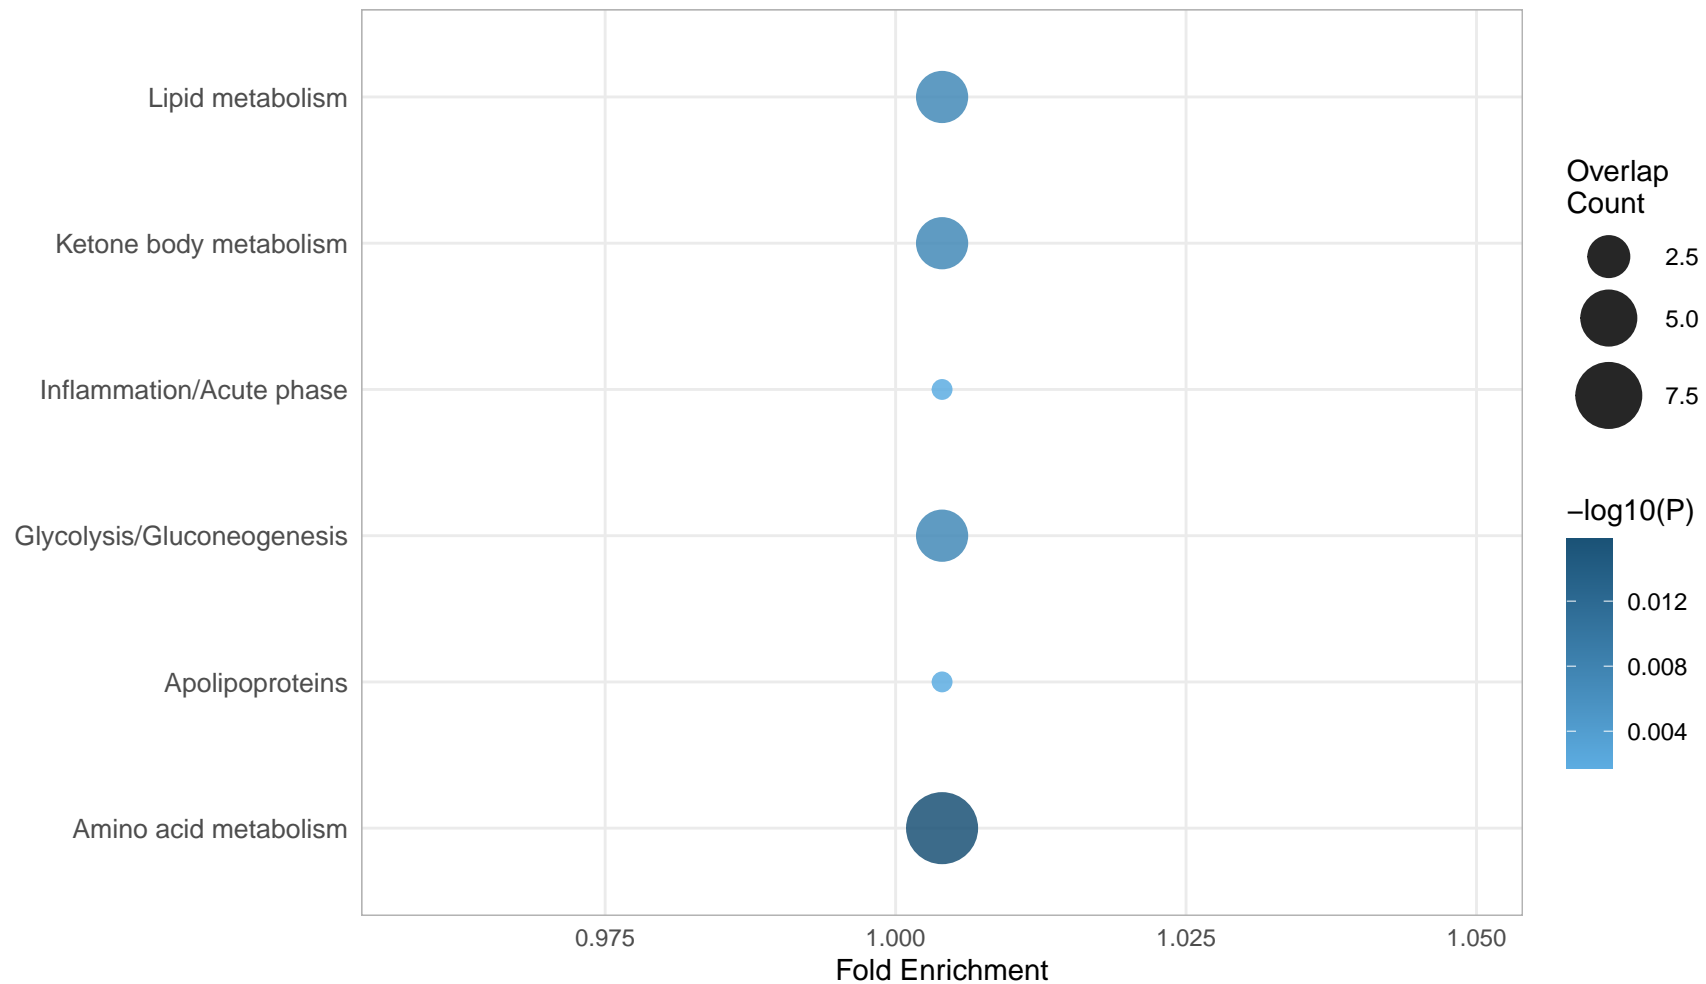

Supplement: Supplementary file 7 [file figS7a_enrichment_metabolomics.pdf › Output_Results/figS7a_enrichment_metabolomics.pdf]

# Proteomics: Pathway Enrichment

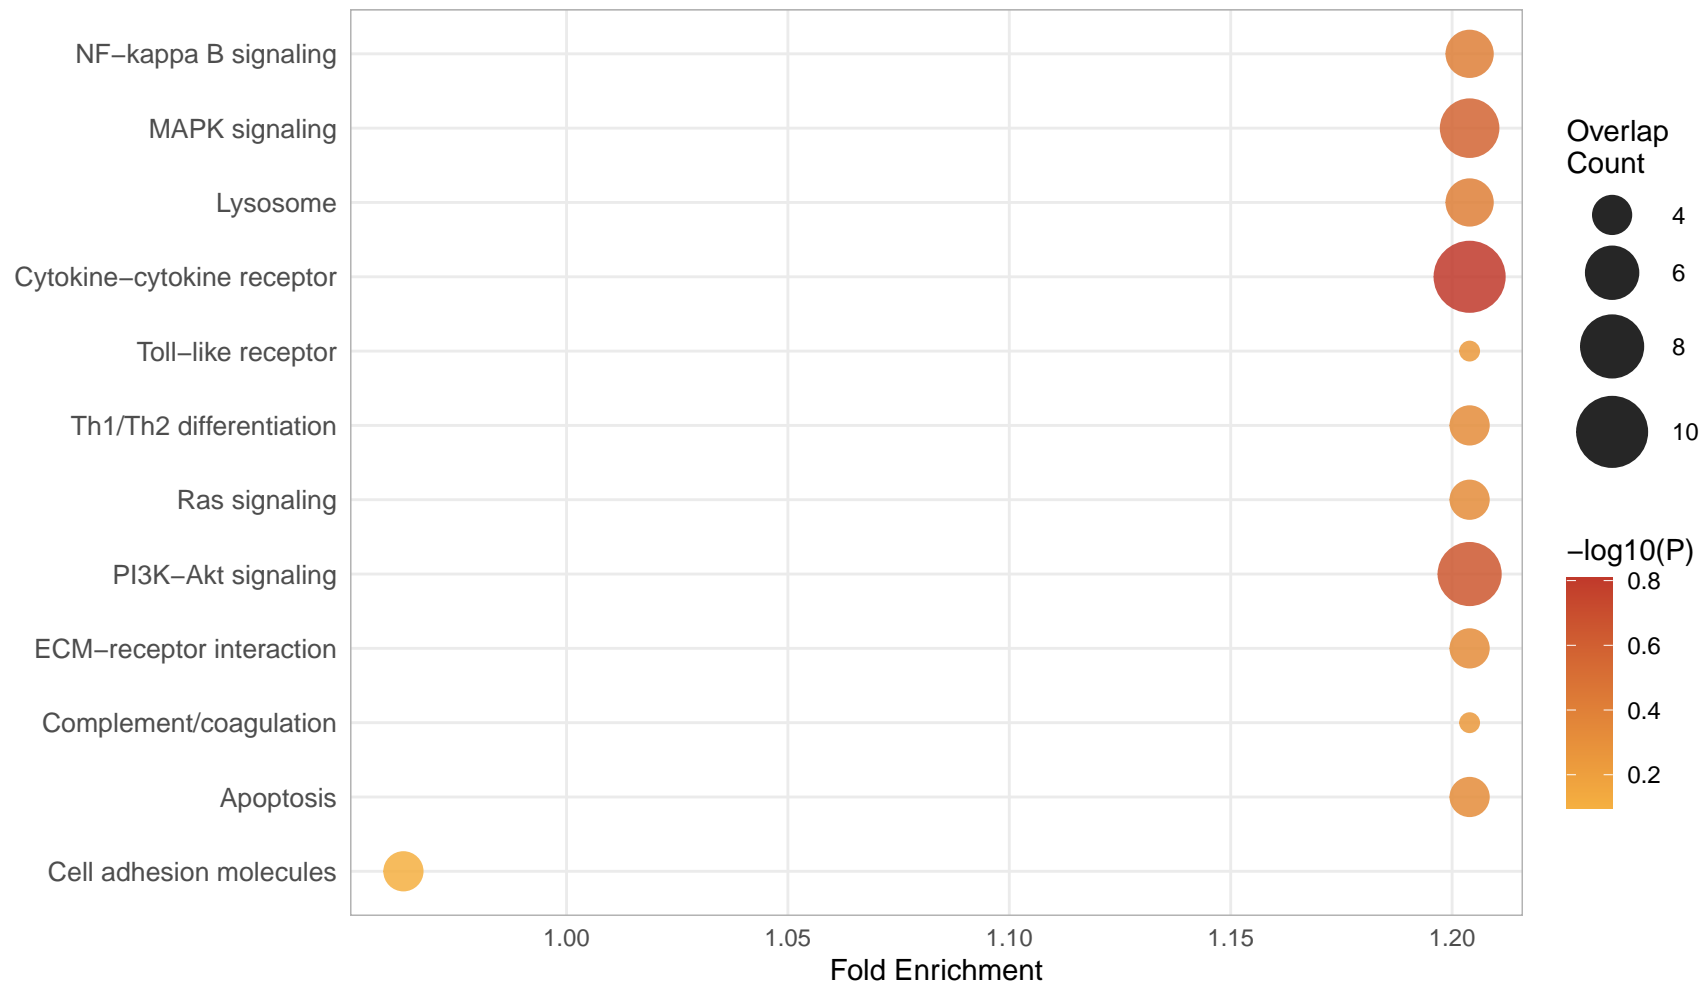

Supplement: Supplementary file 8 [file figS7b_enrichment_proteomics.pdf › Output_Results/figS7b_enrichment_proteomics.pdf]

# Pathway Enrichment Across Disease Transitions

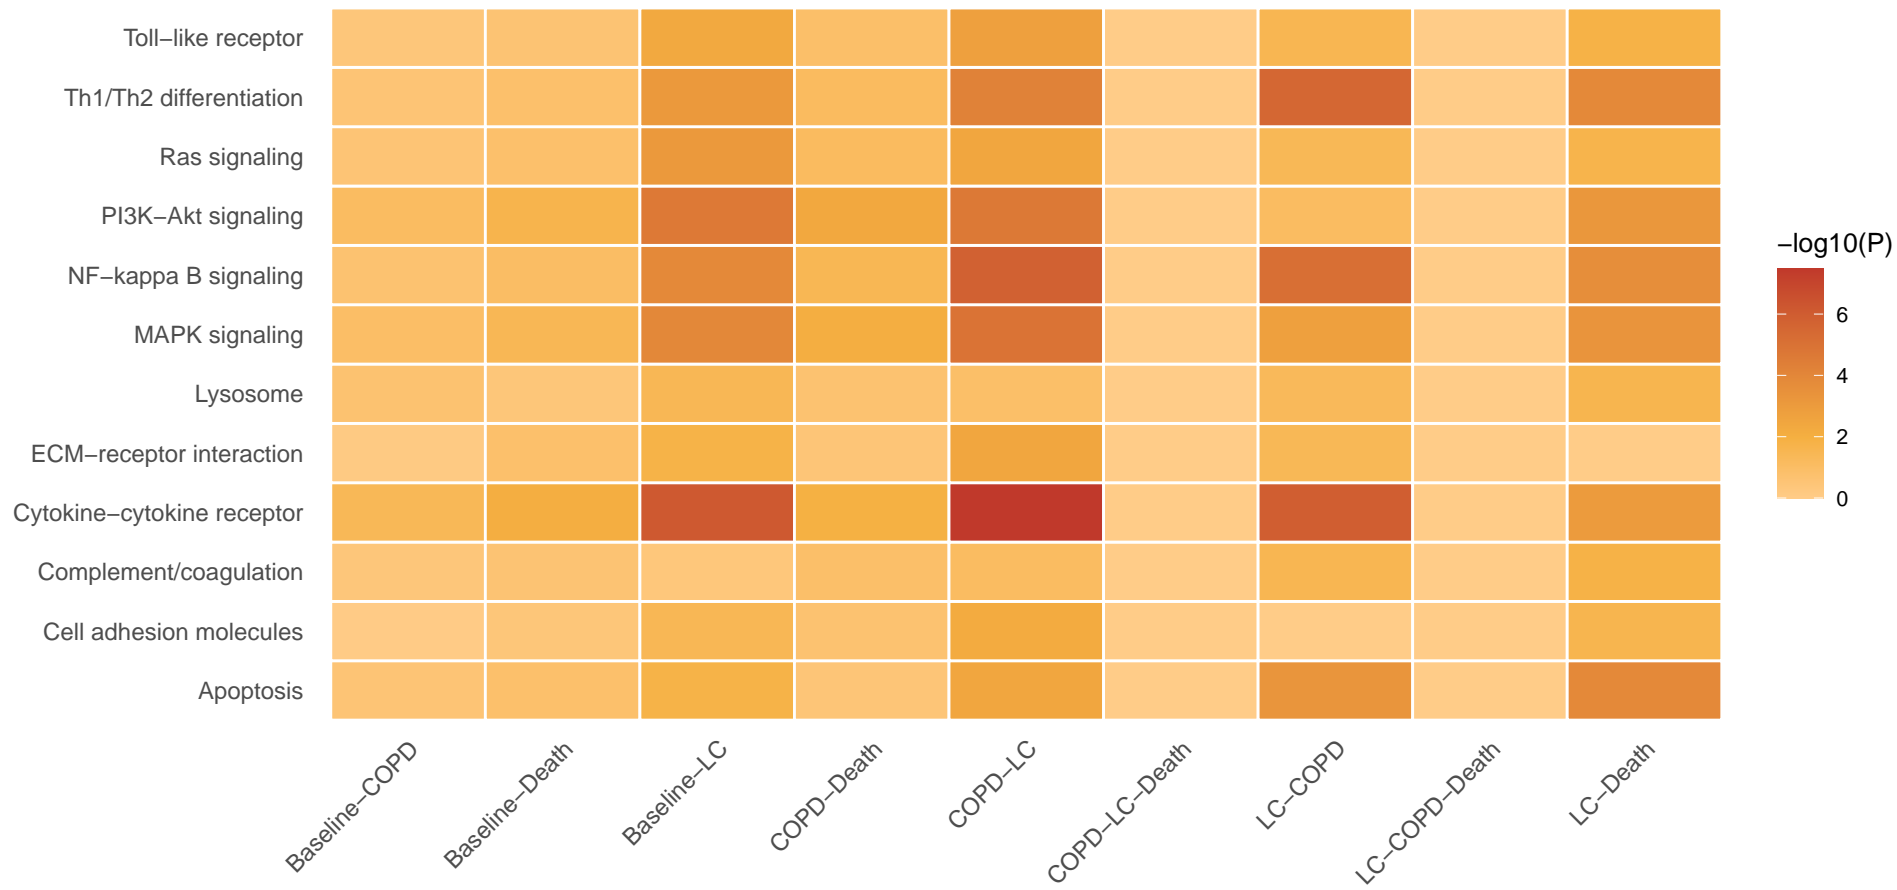

Supplement: Supplementary file 9 [file figS8a_enrichment_heatmap.pdf › Output_Results/figS8a_enrichment_heatmap.pdf]

# Metabolomics

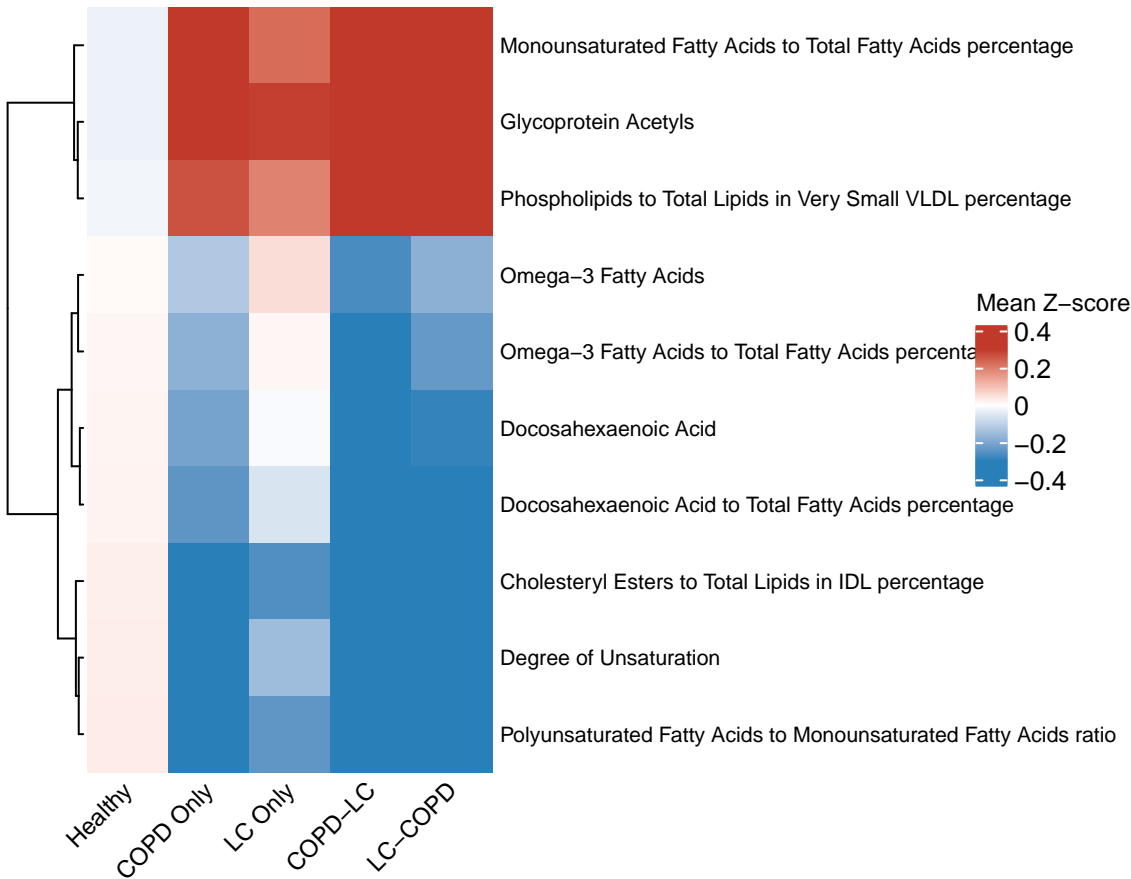

Supplement: Supplementary file 10 [file figS8b_heatmap_metabolomics.pdf › Output_Results/figS8b_heatmap_metabolomics.pdf]

# Proteomics

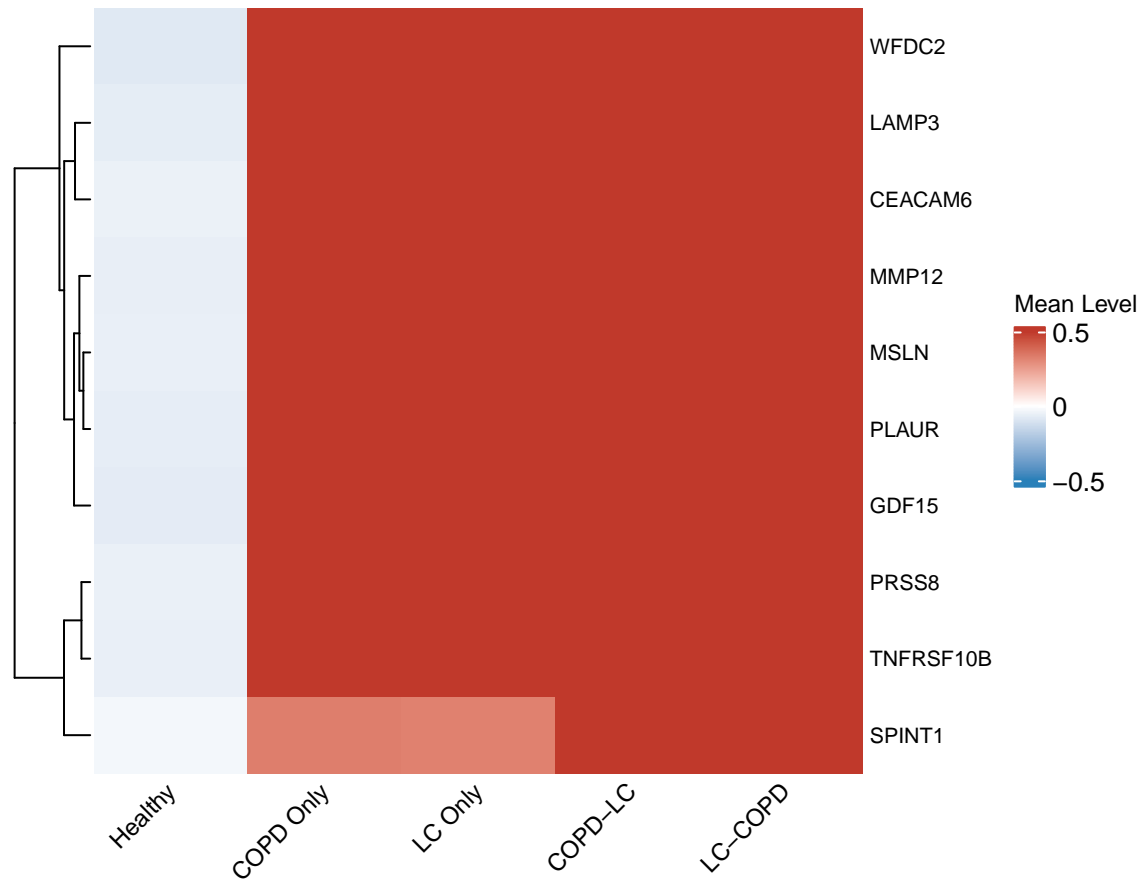

Supplement: Supplementary file 11 [file figS8b_heatmap_proteomics.pdf › Output_Results/figS8b_heatmap_proteomics.pdf]
